# Supplementary material for: Therapeutic Antibody Against Phosphorylcholine Preserves Coronary Function and Attenuates Vascular 18F-FDG Uptake in Atherosclerotic Mice
Source: PubMed Central journal article supplement — JACC Basic Transl Sci. 2020 Mar 25;5(4):360–73. doi: 10.1016/j.jacbts.2020.01.008 (PMC7188869; doi:10.1016/j.jacbts.2020.01.008), 2020-03-25
Supplement: mmc1.pdf [file mmc1.pdf]

1 **SUPPLEMENTAL MATERIAL**

2 **Therapeutic antibody against phosphorylcholine preserves coronary function and**  
3 **attenuates vascular <sup>18</sup>F-FDG uptake in atherosclerotic mice**

4

5 Mia Ståhle, MSc,<sup>a</sup> Johanna M. U. Silvola, PhD,<sup>a</sup> Sanna Hellberg, PhD,<sup>a</sup> Margreet de Vries, PhD,<sup>b</sup> Paul  
6 H. A. Quax, PhD,<sup>b</sup> Jeffrey Kroon, PhD,<sup>c</sup> Petteri Rinne, PhD<sup>d,e</sup> Alwin de Jong, MSc,<sup>b</sup> Heidi Liljenbäck,  
7 MSc,<sup>a,e</sup> Nina Savisto, PhD,<sup>a</sup> Anna Wickman, PhD,<sup>f</sup> Erik S. G. Stroes, MD, PhD,<sup>c,g</sup> Seppo Ylä-Herttuala,  
8 MD, PhD,<sup>h</sup> Pekka Saukko, MD, PhD,<sup>i</sup> Tommy Abrahamsson, MD, PhD,<sup>j</sup> Knut Pettersson, PhD,<sup>j</sup>  
9 Juhani Knuuti, MD, PhD,<sup>a,k</sup> Anne Roivainen, PhD,<sup>a,e</sup> Antti Saraste, MD, PhD<sup>a,k,l,m</sup>

10

11 <sup>a</sup>Turku PET Centre, University of Turku, Turku, Finland, <sup>b</sup>Eindhoven Laboratory for Experimental  
12 Vascular Medicine, Department of Surgery, Leiden University Medical Center, Leiden, the  
13 Netherlands, <sup>c</sup>Department of Experimental Vascular Medicine, Amsterdam Cardiovascular  
14 Sciences, Amsterdam UMC, University of Amsterdam, Amsterdam, the Netherlands, <sup>d</sup>Research  
15 Center for Integrative Physiology and Pharmacology, Institute of Biomedicine, University of  
16 Turku, Turku, Finland <sup>e</sup>Turku Center for Disease Modeling, University of Turku, Turku, Finland,  
17 <sup>f</sup>i3tex AB, Gothenburg, Sweden, <sup>g</sup>Department of Vascular Medicine, Academic Medical Center,  
18 Amsterdam UMC, Amsterdam, the Netherlands, <sup>h</sup>A.I. Virtanen Institute for Molecular Sciences,  
19 University of Eastern Finland, Kuopio, Finland, <sup>i</sup>Department of Pathology and Forensic Medicine,  
20 University of Turku, Turku, Finland, <sup>j</sup>Athera Biotechnologies AB, Stockholm, Sweden, <sup>k</sup>Turku PET  
21 Centre, Turku University Hospital, Turku, Finland, <sup>l</sup>Heart Center, Turku University Hospital,  
22 Turku, Finland, <sup>m</sup>Institute of Clinical Medicine, Turku University Hospital, Turku, Finland

23

24 **Address for Correspondence:** Antti Saraste, Turku PET Centre, Turku University Hospital,  
25 Kiinamylynkatu 4-8, FI-20520 Turku, Finland. Tel: +358 2 3130083, Fax: +358 2 2318191, E-  
26 mail: antti.saraste@utu.fi

1 **Supplemental methods**

2

3 **Blood samples**

4 Glucose levels were measured with a glucometer (Bayer Contour, Bayer AG, Leverkusen,  
5 Germany) from whole blood samples withdrawn from the femoral vein at the time of <sup>18</sup>F-FDG  
6 injection. Plasma concentrations of cholesterol, low-density lipoprotein (LDL), high-density  
7 lipoprotein (HDL), and triglycerides were measured using a Konelab 20i chemistry analyzer  
8 (Thermo Fisher Scientific, MA, USA), while X19-mu antibody was measured from terminal blood  
9 samples collected by heart puncture. X19-mu and PC-mAb were measured with a modified  
10 CVDefine ELISA kit (Athera Biotechnologies AB, Stockholm, Sweden) where the original  
11 secondary antibody (detecting human IgM) was replaced with anti-IgG (AffiniPure goat anti-  
12 mouse IgG [H+L] and goat anti-human IgG [H+L], respectively; Jackson Immuno Research  
13 Laboratories, Baltimore, MD, USA). The assay is based on PCs covalently linked to bovine serum  
14 albumin coated onto 96-well microtiter plates. All incubations were carried out at room  
15 temperature.

16

17 **Histology and immunofluorescence**

18 Primary antibodies and detection methods are shown in Supplemental Table 1. The sections  
19 were scanned with a digital slide scanner (Pannoramic 250 Flash; 3DHistech Ltd., Budapest,  
20 Hungary) for histology and with a fluorescence scanner (Pannoramic MIDI) or microscopes  
21 (Nikon Ti-2E, objective 20x/0.75; Nikon, Amsterdam, the Netherlands, and Zeiss LSM700,  
22 objective 40x/1.4 Oil DIC; Zeiss GmbH, Oberkochen, Germany) for immunofluorescence. One to  
23 three sections per staining per mouse were analyzed using Image-J 1.46 software (NIH,  
24 Bethesda, MD, USA). The percentage of intimal area positive for macrophages, IL-1 $\beta$  and MCP-1  
25 staining was calculated, and lesion endothelial lining positive for VCAM-1 and ICAM-1 was  
26 graded as 1 (<30%), 2 (30-60%) or 3 (>60%). Apoptotic macrophages were measured as the  
27 number of Mac-3 macrophages positive for caspase-3 per intimal area (mm<sup>2</sup>).

1

## 2 **Endothelium-mediated vasodilatation**

3 Endothelium-mediated vasodilatation was investigated in male apolipoprotein E deficient  
4 (ApoE<sup>-/-</sup>) mice (B6.129P2-Apoet<sup>m1Unc</sup>/J, Taconic, Silkeborg, Denmark) after feeding with a high-  
5 fat diet for 20 weeks, starting at the age of 8 weeks as previously described (2). The mice were  
6 randomized to receive intraperitoneal injections containing either 0.9% saline solution as a  
7 vehicle (n=8) or 10 mg/kg X19-mu antibody (n=7), once a week, for 8 weeks. Then, mice were  
8 anesthetized with isoflurane and arterial blood pressure was monitored for 3 minutes after  
9 intravenous injection of an equal volume of either saline or methacholine (3 µg/kg of Acetyl-β-  
10 methylcholine-chloride, 98%, Sigma-Aldrich, St. Louis, MO, USA) using a 1250 Hz catheter-tip  
11 pressure transducer (Samba Sensor preclin 420LP, Gothenburg, Sweden) introduced into the  
12 aortic arch through a left carotid artery incision. The results were expressed as the maximal  
13 change in systolic and diastolic blood pressure (SBP and DBP) caused by methacholine  
14 subtracted the change obtained by saline injection.

15

## 16 **Cell culture**

17 Primary human aortic endothelial cells (HAECs) were purchased from Lonza (Baltimore, MD,  
18 USA). Cells were seeded on fibronectin-coated tissue culture-treated wells. HAECs were  
19 maintained in EGM-2 medium (Lonza) at 37 and 5% CO<sub>2</sub>). Cells between passage 4-7 were used  
20 for experiments.

21

## 22 **Lipoprotein(a) [Lp(a)] isolation**

23 Lipoprotein fractions were isolated from plasma of three different male and female  
24 normolipidemic volunteers (both male and female from different ages). A detailed procedure of  
25 the used isolation method can be found elsewhere (1). While in this manuscript the Lp(a)  
26 fraction, instead of the LDL fraction was isolated. In short, samples were centrifuged under  
27 vacuum conditions for 19 hours at 29.000 rpm at 10degr in a SW 41 Ti rotor without brake

1 (Beckman Coulter Inc., CA, USA). After the run, the obtained Lp(a) fraction was sliced out,  
2 dialyzed and filter sterilized (0.2  $\mu\text{m}$  pore size; Sartorius, Göttingen, Germany). Subsequently,  
3 Lp(a) was concentrated using Amicon centrifugal filter units (10.000 MWCO; Millipore). After  
4 measuring Lp(a) concentrations using commercially available immunoturbidimetric enzymatic  
5 assays (Diasys, Holzheim, Germany) on a Selectra system (Sopachem, Ochten, The Netherlands).  
6 Finally, Lp(a) was used as indicated.

7

### 8 **Nitric oxide (NO) assay kit**

9 Intracellular NO was measured using a commercially available Nitric Oxide Assay Kit  
10 (fluorometric) according manufacturers' instructions (ab65327, Abcam, Cambridge, UK). Since  
11 NO is rapidly converted to nitrite and nitrate, the total concentration of nitrite and nitrate is  
12 used as a quantitative measure of NO production. In short, after stimulation, cells were washed  
13 twice with cold PBS and resuspended in assay buffer on ice. Next, cells were homogenized,  
14 centrifuged and assayed. First, nitrate is converted to nitrite by nitrate reductase. Subsequently,  
15 nitrate reacts with the fluorescent DAN (2,3 diaminoanthalene), where the intensity is  
16 proportional to the total nitric oxide production. Fluorescent intensity was measured using a  
17 FLUOstar Galaxy (BMG Labtechnologies, Offenburg, Germany) at Ex/Em = 460/450 nm and a  
18 standard curve was used to calculate the concentrations.

19

### 20 **Cytokine measurements**

21 Cytokine (protein) production was measured in supernatants of HAECs using commercial  
22 enzyme-linked immunosorbent assay kits for IL-6 and IL-8 (ThermoFisher), following the  
23 manufacturers' instructions

24

### 25 **RNA isolation and quantitative PCR analysis**

26 RNA was extracted from cultured cells using Trizol and cDNA was synthesized with iScript  
27 (Biorad, Veenendaal, The Netherlands). qPCR was performed with 500 ng cDNA using SYBR

1 Green Fast on a ViiAa7 PCR machine (Applied Biosystems, Bleiswijk, The Netherlands). Primers  
2 for *IL6*, *IL8*, *ICAM1*, *VCAM1* and *36B4* were obtained from Sigma Aldrich (Zwijndrecht, The  
3 Netherlands). Gene expression was normalized to the housekeeping gene *36B4*. The primer  
4 sequences that were used are: *IL6* Forward: CTG CAG AAA AAG GCA AAG AAT CTA, Reverse: GTT  
5 GTC ATG TCC TGC AGC C; *IL8* Forward: TGT TCC ACT GTG CCT TGG TTT CTC C, Reverse: TGC  
6 TTC CAC ATG TCC TCA CAA CAT CAC; *ICAM1* forward: ATG GCA ACG ACT CCT TCT CG, reverse:  
7 GCC GGA AAG CTG TAG ATG GT; *VCAM1* forward: TGT CAA TGT TGC CCC CAG A, reverse: TGC  
8 TCC ACA GGA TTT TCG GA; *36B4* forward: GAA CAT CTC CCC CTT CTC CTT C, reverse: ATT GCG  
9 GAC ACC CTC TAG GAA.

10

### 11 **Biodistribution of <sup>18</sup>F-FDG uptake**

12 Samples from other organs including the brain, heart, intestine, kidney, liver, lung, lymph node,  
13 muscle, pancreas, spleen, and white and brown adipose tissue were prepared and total  
14 radioactivity was measured using a gamma counter (Triathler 3", Hidex Oy, Turku, Finland).  
15 Radioactivity values were normalized for injected radioactivity dose per animal weight, decay,  
16 and the weight of the tissue sample. Results were expressed as standardized uptake values  
17 (SUV).

18

### 19 **Supplemental results**

20

#### 21 **X19-mu treatment improved endothelium-mediated vasodilatation**

22 Blood pressure was similar in vehicle- and X19-mu-treated mice before methacholine injection  
23 (SBP 139±21 vs. 135±16 mmHg, p=0.70 and DBP 88±10 mmHg vs. 88±15 mmHg, p=0.99,  
24 respectively). Methacholine had no effect on arterial blood pressure in vehicle-treated mice,  
25 whereas there was a transient reduction in blood pressure without change in heart rate in X19-  
26 mu-treated mice (SBP +1.9±4.9 mmHg vs. -5.0±5.6 mmHg, p=0.036 vs. vehicle, and DBP  
27 +0.50±3.0 mmHg vs. -4.3±4.0 mmHg, p=0.023 vs. vehicle). (Supplemental Figure 3)

1 **Supplemental Tables**

2  
3 **Supplemental Table 1.** Primary antibodies and detection methods used for immunofluorescence and immunohistochemical stainings.  
4

| <b>Antibody</b> | <b>Clone</b>                                              | <b>Dilution</b>        | <b>Manufacturer</b>                                   | <b>Detection</b>                                                                                                                                                                          |
|-----------------|-----------------------------------------------------------|------------------------|-------------------------------------------------------|-------------------------------------------------------------------------------------------------------------------------------------------------------------------------------------------|
| Mac-3 *         | Monoclonal rat anti-mouse Mac-3, 550292                   | IF 1:200<br>IHC 1:5000 | BD Pharmingen,<br>Franklin Lakes, NJ, US              | IF: Donkey anti-rat Alexa 594, A21209, 1:250<br>(Invitrogen, Carlsbad, CA, US)<br>IHC: Vectastain ABC-HRP kit (Vector Laboratories,<br>Burlingame, CA, USA) + chromogen (DAB, Dako K3468) |
| CCR2            | Polyclonal rabbit anti-mouse CCR2,<br>GR172538            | 1:400                  | Abcam, Cambridge, UK                                  | Donkey anti-rabbit Alexa 488, A21206, 1:250<br>(Invitrogen, Carlsbad, CA, US)                                                                                                             |
| CD206           | Polyclonal rabbit anti-mouse CD206,<br>GR216007-1         | 1:300                  | Abcam, Cambridge, UK                                  | Donkey anti-rabbit Alexa 488, A21206, 1:250<br>(Invitrogen, Carlsbad, CA, US)                                                                                                             |
| VCAM-1          | Monoclonal rabbit anti-mouse VCAM-1,<br>ab134047          | 1:100                  | Abcam, Cambridge, UK                                  | Donkey anti-rabbit Alexa 594, A21207, 1:200<br>(Invitrogen, Carlsbad, CA, US)                                                                                                             |
| ICAM-1          | Polyclonal rabbit anti-mouse ICAM-1,<br>sc-1511-R         | 1:300                  | SantaCruz,<br>Dallas, TX, US                          | Goat anti-rabbit Alexa 647, A21244, 1:1000<br>(Invitrogen, Carlsbad, CA, US)                                                                                                              |
| IL-1 $\beta$    | Polyclonal rabbit anti-mouse IL-1 $\beta$ ,<br>ab9722     | 1:100                  | Abcam, Cambridge, UK                                  | Donkey anti-rabbit Alexa 594, A21207, 1:200<br>(Invitrogen, Carlsbad, CA, US)                                                                                                             |
| MCP-1           | Monoclonal rat anti-mouse<br>CCL2/MCP-1, NBP1-42280       | 1:300                  | Novus Biologicals,<br>Abingdon, UK                    | Goat anti-rat Alexa 647, A21247, 1:1000<br>(Invitrogen, Carlsbad, CA, US)                                                                                                                 |
| Caspase-3 †     | Polyclonal rabbit anti-mouse<br>Cleaved Caspase-3, 9661-s | 1:400                  | Cell Signaling Technology,<br>Leiden, The Netherlands | Goat anti-rabbit Alexa 555, A21428, 1:1000<br>(Invitrogen, Carlsbad, CA, US)                                                                                                              |
| CD31            | Polyclonal rabbit anti-mouse,<br>CD31/PECAM-1, sc-1506-R  | 1:100                  | SantaCruz,<br>Dallas, TX, US                          | Donkey anti-rabbit Alexa 488, A21206, 1:250<br>(Invitrogen, Carlsbad, CA, US)                                                                                                             |
| PC ‡            | Non-commercial monoclonal<br>fully human PC-mAb           | 1:10                   | Athera Biotechnologies AB,<br>Stockholm, Sweden       | Primary antibody is labeled with Cy5<br><br>Mounting medium: ProLong TM Gold antifade reagent<br>with DAPI, P36935 (Invitrogen, Carlsbad, CA, US)                                         |

**Isotype controls**

|                                            |                                             |                                               |                                                                                      |
|--------------------------------------------|---------------------------------------------|-----------------------------------------------|--------------------------------------------------------------------------------------|
| Mac-3                                      | Rat IgG,<br>E019346                         | Thermo Fischer Scientific,<br>Waltham, MA, US | Isotype controls diluted to match primary antibodies,<br>detection methods as above. |
| CCR2, CD206,<br>ICAM-1, CD31,<br>Caspase-3 | Rabbit polyclonal IgG,<br>CTL-4112 (910801) | BioLegend,<br>San Diego, CA, US               |                                                                                      |
| VCAM-1, IL-1 $\beta$                       | Rabbit IgG,<br>31235                        | Thermo Fischer Scientific,<br>Waltham, MA, US |                                                                                      |
| MCP-1                                      | Rat IgG,<br>14-4031-81                      | Thermo Fischer Scientific,<br>Waltham, MA, US |                                                                                      |
| PC                                         | Goat IgG,<br>sc-2028                        | SantaCruz,<br>Dallas, TX, US                  |                                                                                      |

\*Co-staining with CCR2 or CD206 antibody, † Co-staining with Mac-3 antibody, ‡ Co-staining with Mac-3 and CD31 antibodies.  
IF; immunofluorescence, IHC; immunohistochemistry.

1 **Supplemental Table 2.** Coronary flow velocity and reserve before and after 6 week treatment with vehicle or X19-mu.  
 2

|                                            | Rest     |           |                  | Adenosine |           |                  | CFR        |            |                  |
|--------------------------------------------|----------|-----------|------------------|-----------|-----------|------------------|------------|------------|------------------|
|                                            | Week 0   | Week 6    | <i>p-value</i> † | Week 0    | Week 6    | <i>p-value</i> † | Week 0     | Week 6     | <i>p-value</i> † |
| <b>Mean diastolic flow velocity (mm/s)</b> |          |           |                  |           |           |                  |            |            |                  |
| Vehicle                                    | 240 ± 87 | 270 ± 110 | 0.40             | 450 ± 160 | 370 ± 160 | 0.29             | 1.9 ± 0.30 | 1.4 ± 0.23 | 0.006            |
| X19-mu                                     | 230 ± 73 | 230 ± 110 | 0.94             | 370 ± 140 | 380 ± 180 | 0.82             | 1.6 ± 0.24 | 1.7 ± 0.24 | 0.32             |
| <i>p-value</i> *                           | 0.73     | 0.37      |                  | 0.22      | 0.90      |                  | 0.024      | 0.012      |                  |

Values are mean ± SD (n=10/group). \*Student's *t*-test for unpaired and †for paired measurements.



1 **Supplemental Table 3.** Biodistribution of <sup>18</sup>F-FDG uptake in LDLR<sup>-/-</sup>ApoB<sup>100/100</sup> mice at the time  
 2 of randomization (week 0) and after a 6 week treatment with vehicle or X19-mu antibody.  
 3

|                   | <b>Week 0</b><br>(n=11) | <b>Vehicle</b><br>(n=16) | <b>X19-mu</b><br>(n=16) |
|-------------------|-------------------------|--------------------------|-------------------------|
| <b>BAT</b>        | 1.0 ± 0.39              | 1.4 ± 0.29*              | 1.4 ± 0.26†             |
| <b>Blood</b>      | 0.25 ± 0.045            | 0.24 ± 0.047             | 0.23 ± 0.082            |
| <b>Brain</b>      | 1.3 ± 0.47              | 1.6 ± 0.33               | 1.3 ± 0.31‡             |
| <b>Heart</b>      | 25 ± 6.2                | 23 ± 7.6                 | 23 ± 7.5                |
| <b>Intestine</b>  | 1.9 ± 0.73              | 1.9 ± 0.59               | 1.8 ± 0.56              |
| <b>Kidney</b>     | 1.5 ± 0.70              | 1.5 ± 0.54               | 1.3 ± 0.38              |
| <b>Liver</b>      | 0.81 ± 0.33             | 0.62 ± 0.071             | 0.62 ± 0.24             |
| <b>Lung</b>       | 2.2 ± 0.50              | 2.1 ± 0.43               | 1.9 ± 0.36              |
| <b>Lymph node</b> | 1.7 ± 0.58              | 1.8 ± 0.36               | 1.8 ± 0.31              |
| <b>Muscle</b>     | 0.69 ± 0.30             | 0.35 ± 0.18†             | 0.48 ± 0.33             |
| <b>Pancreas</b>   | 0.68 ± 0.18             | 0.89 ± 0.24*             | 0.86 ± 0.23             |
| <b>Spleen</b>     | 2.9 ± 0.60              | 2.6 ± 0.41               | 2.4 ± 0.42†             |
| <b>WAT</b>        | 0.079 ± 0.054           | 0.17 ± 0.12              | 0.19 ± 0.11*            |

Results are expressed as standardized uptake values (SUV mean ± SD);

ANOVA followed by Dunnett's post-hoc test for the week 0 group and

Student's *t*-test for unpaired (vehicle vs. X19-mu) measurements;

\*p<0.05, †p<0.01 vs. week 0 and ‡p<0.05 vehicle vs. X19-mu.

BAT; brown adipose tissue, WAT; white adipose tissue.

4

1 **Supplemental Figure legends**

2 **Supplemental Figure 1.** Binding affinities of a fully human PC-mAb and X19-mu antibodies to  
3 phosphorylcholine (PC) are comparable. The binding affinity curves measured by ELISA  
4 (expressed as optical density OD) show a similar binding efficacy to PC between PC-mAb and  
5 X19-mu antibody. Curves represent a mean of three antibody batches analyzed for both PC-mAb  
6 and X19-mu.

7

8 **Supplemental Figure 2.** Control immunofluorescence stainings with non-immune IgGs. Images  
9 of atherosclerotic lesions from the aortic root stained with appropriate isotype controls and  
10 secondary antibodies. Rabbit polyclonal IgG for CCR2 and CD206 antibodies (scale bar = 50  $\mu$ m)  
11 (A), rabbit IgG for VCAM-1, IL-1 $\beta$  and ICAM-1, rat IgG for MCP-1 and rabbit IgG for Caspase-3  
12 antibody (scale bar = 50  $\mu$ m) (B), and rabbit polyclonal IgG for CD31, goat IgG for PC and rat IgG  
13 for Mac-3 antibody (scale bar = 75  $\mu$ m) (C),

14

15 **Supplemental Figure 3.** X19-mu treatment improves endothelium-mediated vasodilatation.  
16 Representative images of the arterial blood pressure in response to methacholine (MCh) over  
17 time recorded by an aortic catheter in a mouse treated with X19-mu or vehicle (A). Treatment  
18 with X19-mu caused a transient reduction in blood pressure in response to MCh compared with  
19 vehicle treatment (B). Maximal change in blood pressure shown as individual data points with  
20 mean $\pm$ SD; Student's *t*-test for unpaired measurements; n=6-8/group. DBP=diastolic blood  
21 pressure, SBP=systolic blood pressure.

22

23 **Supplemental Figure 4.** X19-mu treatment reduces <sup>18</sup>F-FDG uptake in atherosclerotic lesions  
24 both in female and male mice. <sup>18</sup>F-FDG uptake in atherosclerotic lesions (normalized by the  
25 activity of lesion-free vessel wall) was lower after a 6 week treatment with X19-mu in both  
26 females and males compared with vehicle. Results are expressed as individual data points with  
27 mean  $\pm$  SD; Student's *t*-test for unpaired measurements; n=8/group.

1 **Supplemental Figures**

2

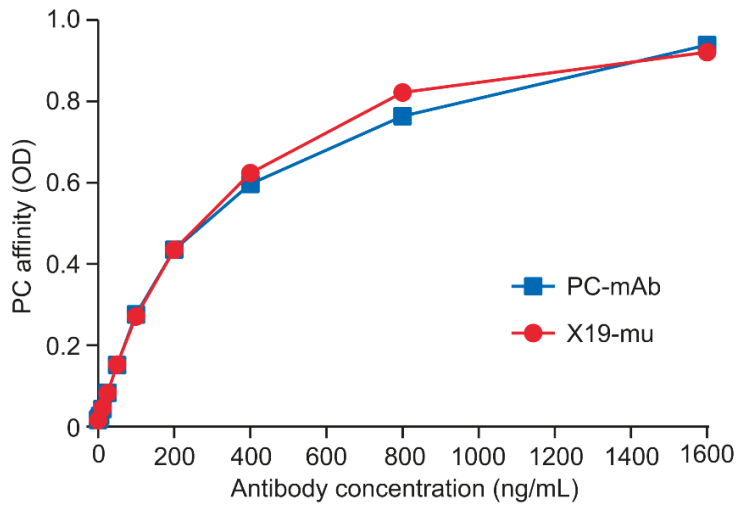

3

4 **Supplemental Figure 1.**

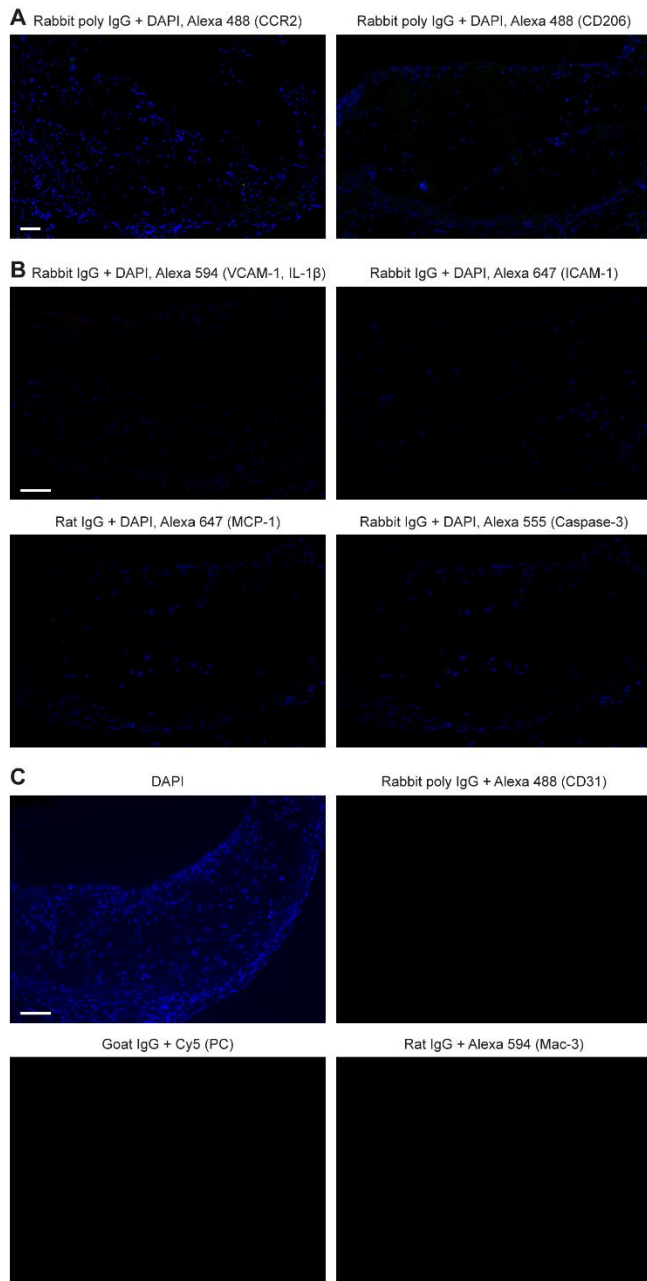

1

2 **Supplemental Figure 2.**

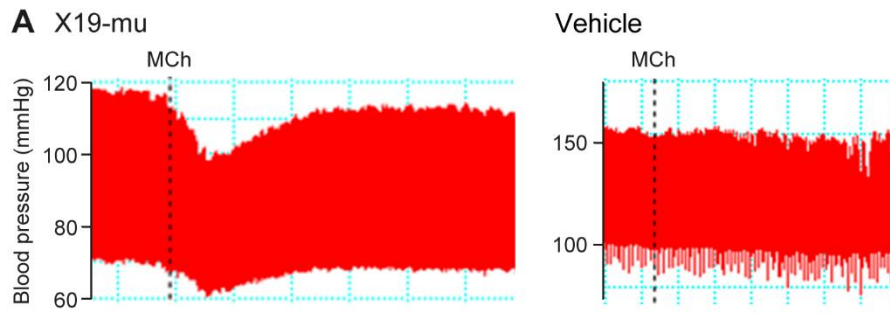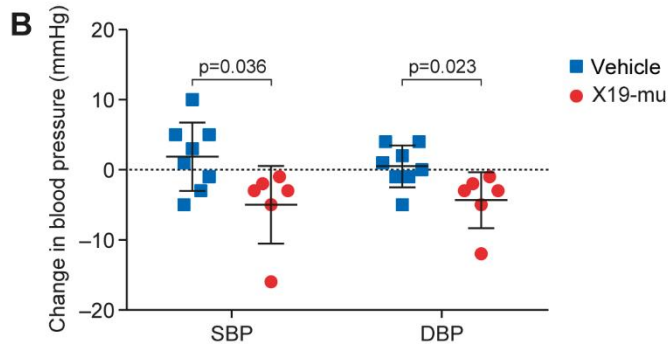

1

2 **Supplemental Figure 3.**

3

4

5

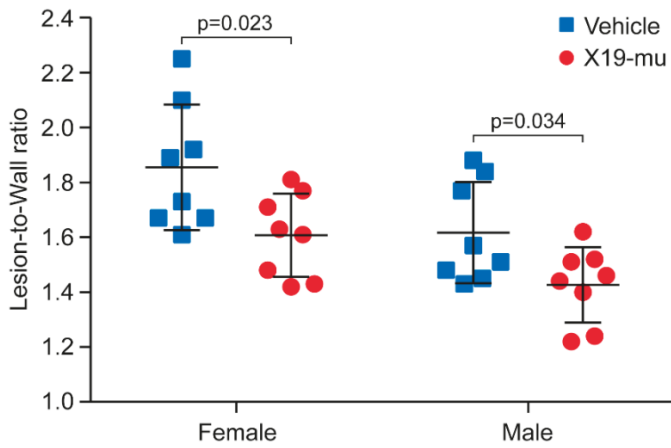

6

7 **Supplemental Figure 4.**

8

9

1 **References**

- 2 1 Schnitzler J, Bernelot Moens J, Tiessens F, et al. Nile Red Quantifier: a novel and  
3 quantitative tool to study lipid accumulation in patient-derived circulating monocytes  
4 using confocal microscopy. *J Lipid Res* 2017;58:2210–19.
- 5 2. Ewing MM, de Vries MR, Nordzell M, et al. Annexin A5 therapy attenuates vascular  
6 inflammation and remodeling and improves endothelial function in mice. *Arterioscler*  
7 *Thromb Vasc Biol* 2011;31:95–101.
